# Supplementary material for: Guiding Hepatic Differentiation of Pluripotent Stem Cells Using 3D Microfluidic Co-Cultures with Human Hepatocytes
Source: MDPI journal article supplement (doi:10.3390/cells12151982), 2023-08-01
Supplement: s1 [file s1]

## Supplemental data items

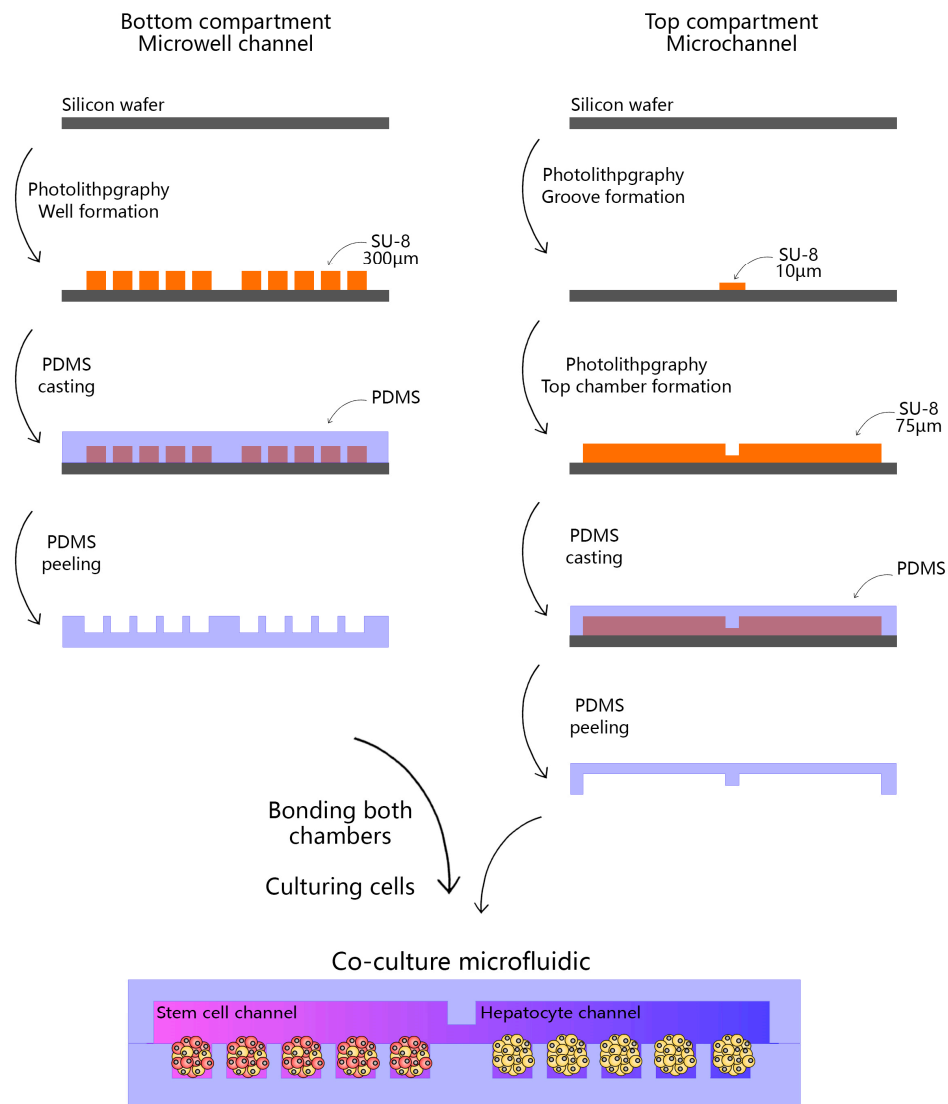

**Figure S1. Process of fabricating microfluidic co-culture devices.** Steps of the process to fabricate microwell and flow layers of the microfluidic device. Individual microwells were 300  $\mu$ m diameter  $\times$  300  $\mu$ m height. The flow layer contained fluidic channels with thickness of 75  $\mu$ m. The master molds for each layer were fabricated using SU-8 photolithography and replicated in PDMS. After curing, the PDMS, the layers were peeled off and bonded together to create a microfluidic device.

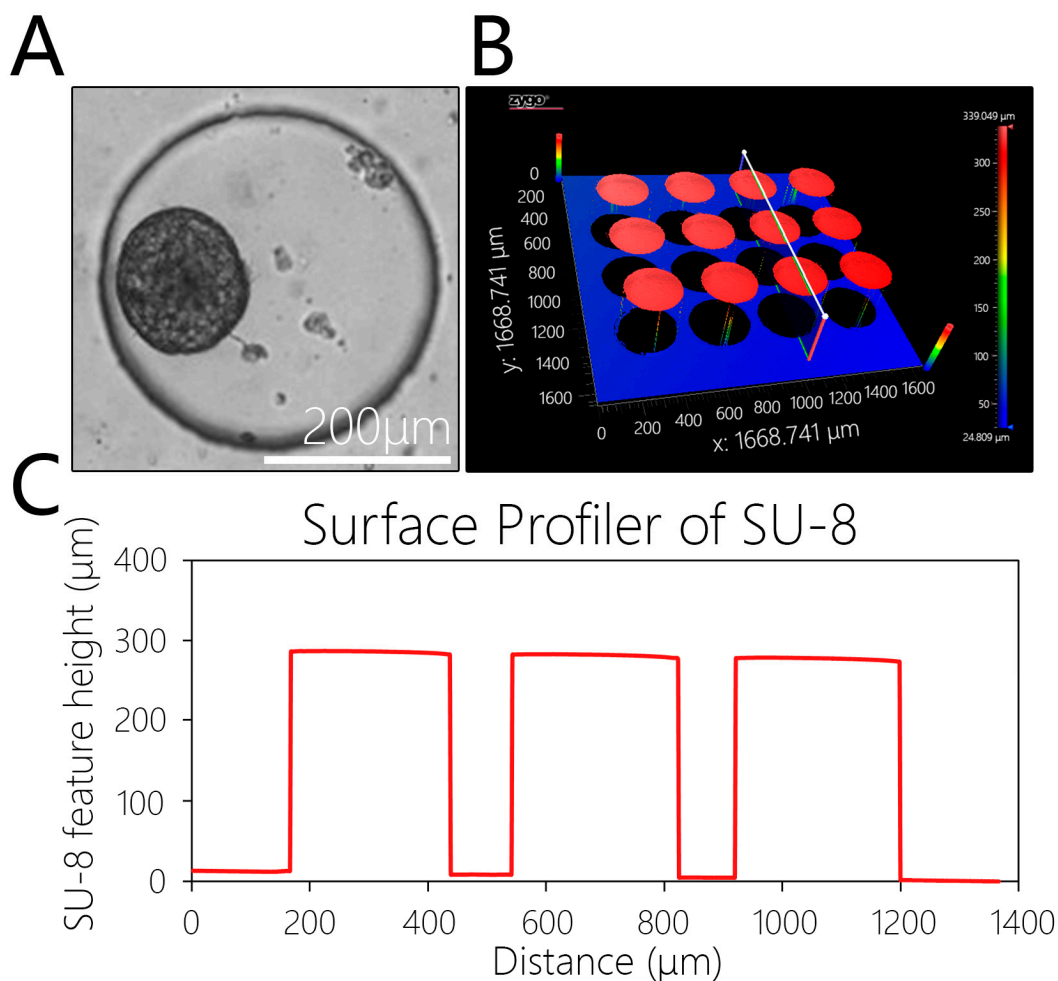

**Figure S2. Characterization of microwells for spheroid formation.** (A) Brightfield micrograph, showing a close-up image of a hepatocyte spheroid in a microwell. (B) Profilometry of the cell culture compartment, showing that wells were 300  $\mu\text{m}$  deep. (C) Confirmation that features fabricated in SU-8 were consistent with dimensions of the wells.

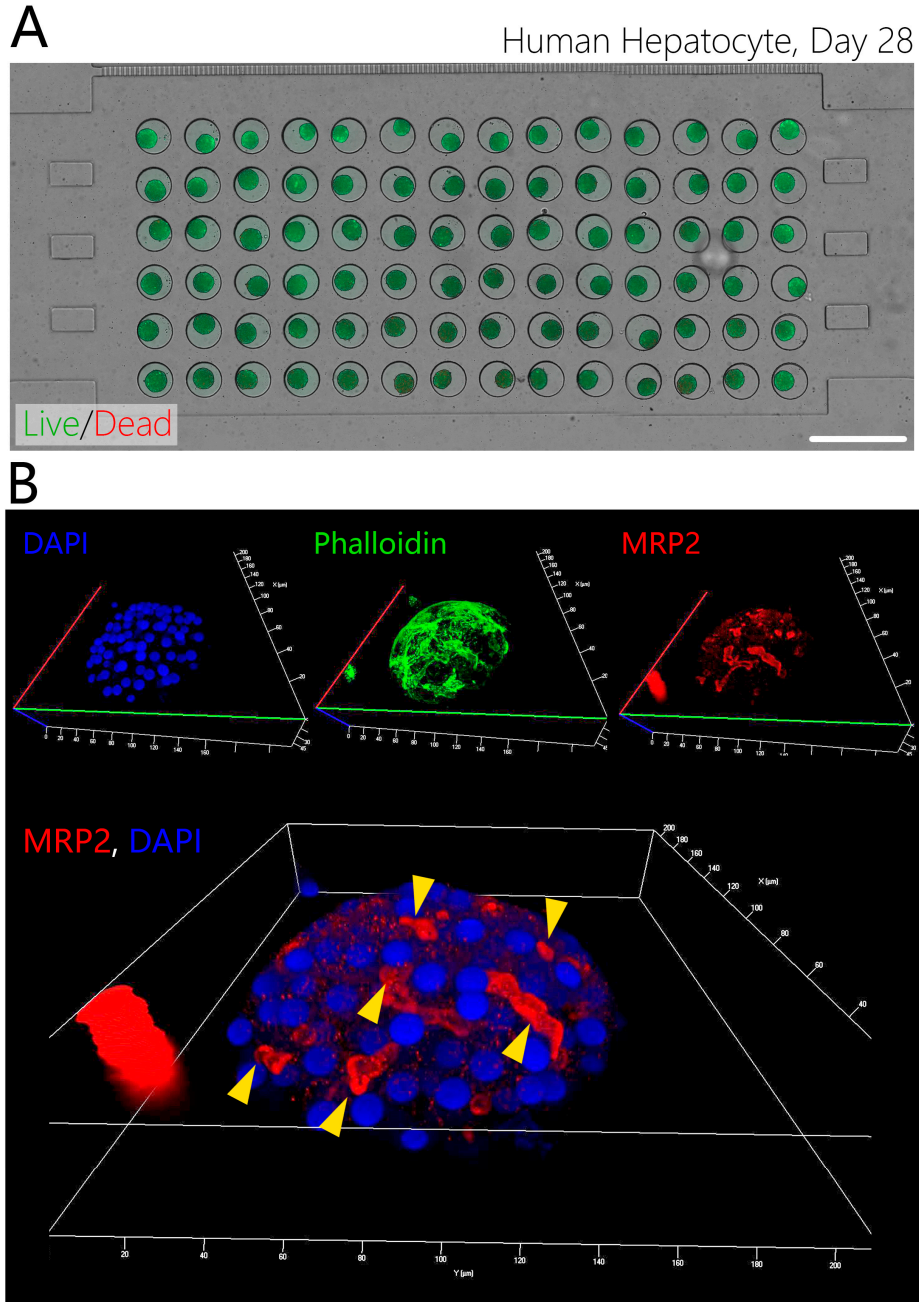

**Figure S3. Morphology and polarization of human hepatocyte spheroids in a microfluidic device.** (A) A zoomed-out view of an array of hepatocyte spheroids in a microfluidic device after 28 days of culture (scale bar = 1mm). Live/Dead staining reveals that cells are viable with minimal cell death observed. (B) A 3D reconstructed image of a hepatocyte spheroid stained for actin (green), MRP2 (red) and nuclei (blue, DAPI) to reveal bile canaliculi (highlighted using yellow arrows).

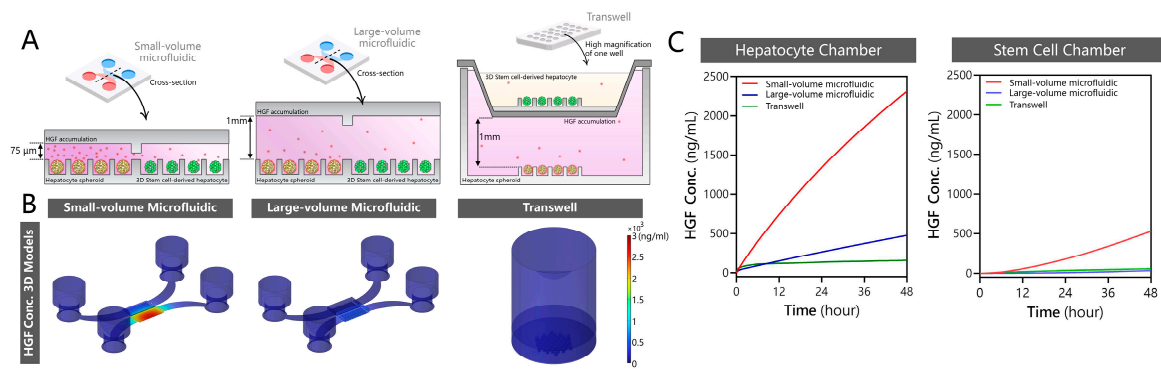

**Figure S4. Modeling of hepatocyte growth factor (HGF) secretion in small- and large-volume cultures.** (A) Schematic describing HGF production in three types of 3D cell culture systems: 1) Small-volume microfluidic, 2) large-volume microfluidic, and 3) transwell format. (B) COMSOL modeling heatmaps of hepatocyte growth factor (HGF) secretion in small-volume microfluidic, large-volume microfluidic and transwell at t=48h. (C) Graphs showing HGF accumulation in hepatocyte chamber (left graph) and stem cell chamber (right graph) over the course of 48 h in small- and large-volume cultures.

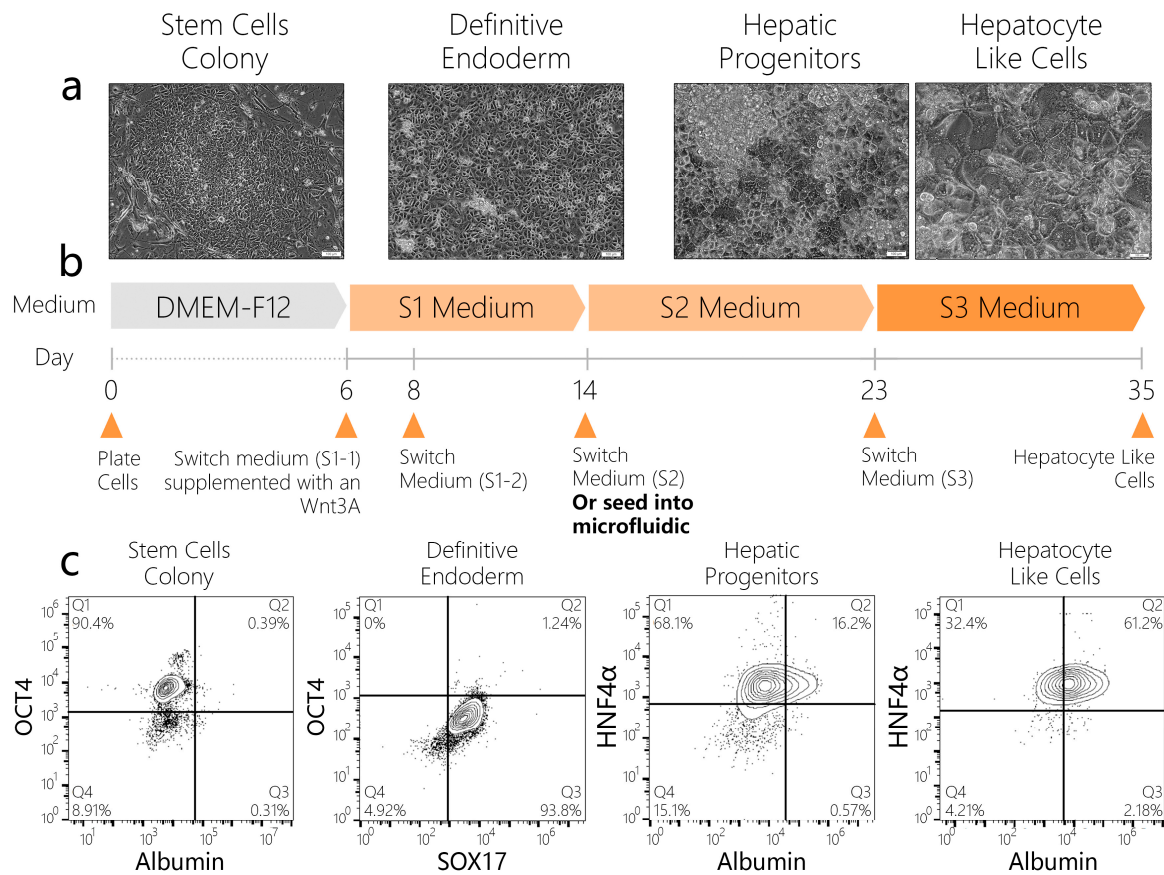

**Figure S5. Hepatic differentiation of stem cells using standard protocol.** (A) Changes in morphology of hESCs in the process of differentiation. (B) Workflow of the conventional 3-stage hepatic differentiation protocol. (C) Flow cytometry analysis at the end of each stage of the 35-day differentiation protocol. Cells from each stage were labeled for a stage-specific marker as follows - stage 0: OCT4+/albumin-, stage 1: OCT4-/SOX17+, stage 2: HNF4α+/albumin+, and stage 3: HNF4α+/albumin+.

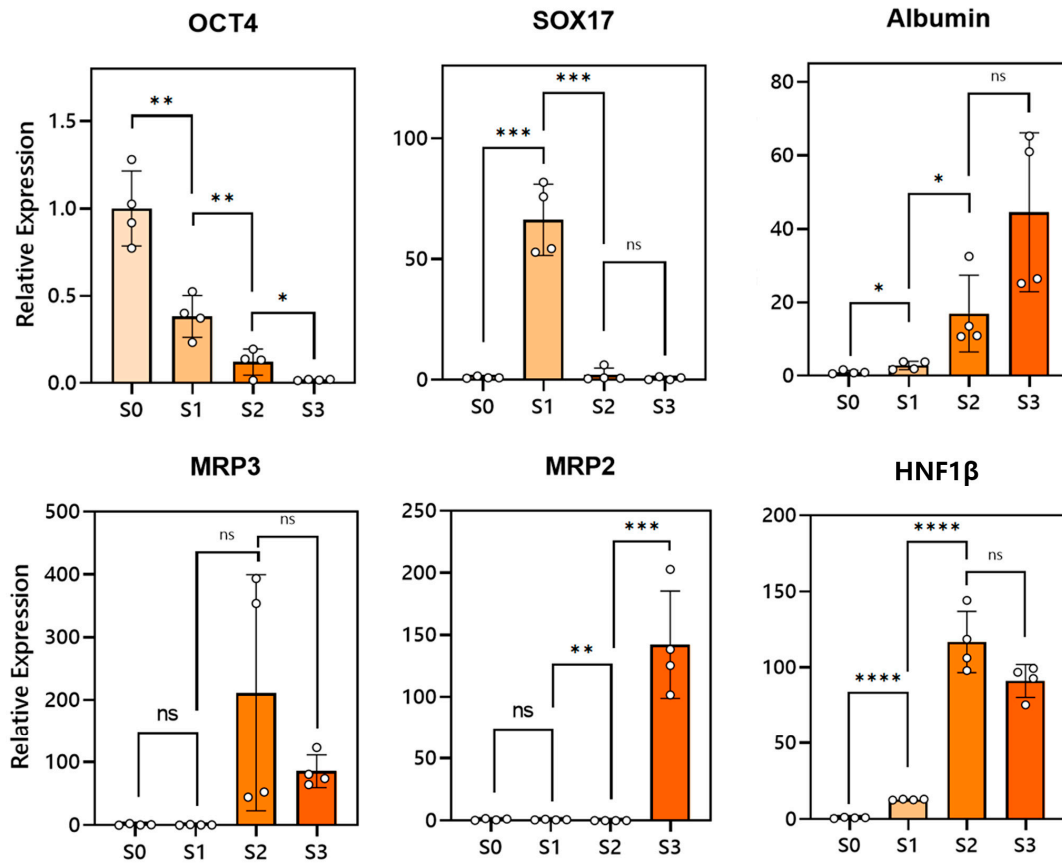

**Figure S6. Expression of key markers during standard hepatic differentiation protocol.**

PCR-RT results for the differentiation of hepatocytes, showing stem cell marker OCT4, definitive endoderm SOX17, and hepatic markers albumin, MRP2, MRP3, HNF4β. These results show higher levels of hepatic marker expression at stage 3 (S3) of differentiation compared to other stages (Data are represented as mean  $\pm$  SD,  $*P \leq 0.05$ ,  $**P \leq 0.01$ ,  $***P \leq 0.001$ ,  $****P \leq 0.0001$ ,  $n = 4$ ).

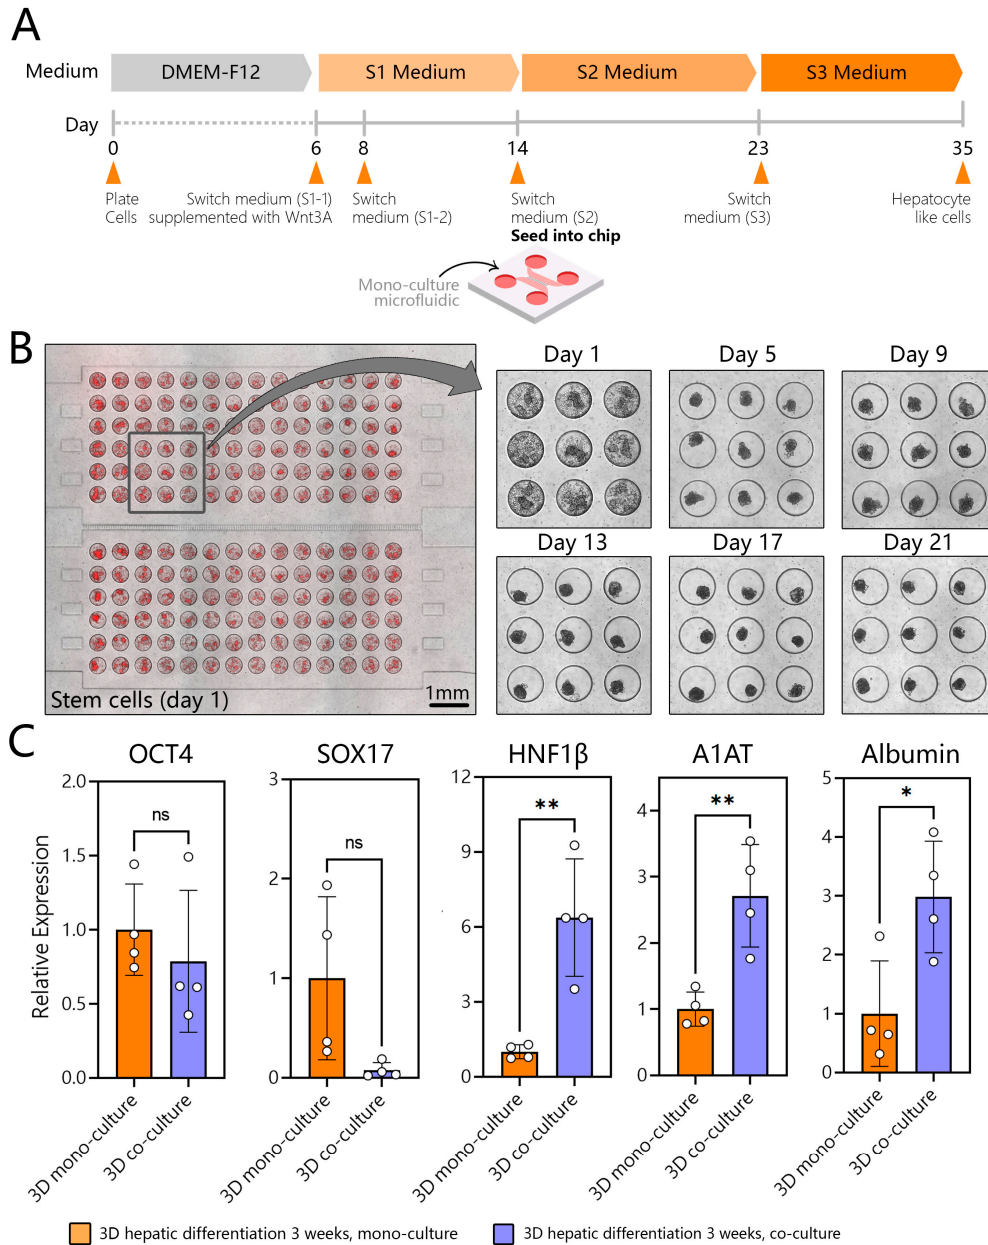

**Figure S7. Differentiation of stem cells as mono-cultures in microfluidic devices.** (A) Workflow for differentiating stem cell-like hepatocytes as a monoculture in a microfluidic device. (B) An image showing DE spheroids in a device as mono-culture. Note that stem cells contained mCherry (red fluorescence) reporter for SOX17 – marker of DE. Also note that the same DE cells were populating both compartments of the microfluidic device. The right panel shows DE spheroids at different timepoints during 3 weeks of culture. (C) RT-PCR analysis of stem cell marker (OCT4), DE marker (SOX17), hepatic markers (A1AT, albumin, HNF4β.). Data are presented as mean standard deviation,  $*P \leq 0.05$ ,  $**P \leq 0.01$ .



**Table S1. Key Resources table**

| Reagent or resource                                      | Source                | Identifier                 |
|----------------------------------------------------------|-----------------------|----------------------------|
| <b>Antibodies</b>                                        |                       |                            |
| OCT4 (OCT3)                                              | STEMCELL Technologies | Clone 3A2A20               |
| SOX17                                                    | Santa Cruz            | sc-17356                   |
| HNF4 $\alpha$                                            | Santa Cruz            | sc-8987                    |
| HNF1 $\beta$                                             | Santa Cruz            | sc-22840                   |
| Albumin                                                  | Santa Cruz            | sc-46293                   |
| AFP                                                      | Santa Cruz            | sc-51506                   |
| MRP2                                                     | Santa Cruz            | sc-5770                    |
| Alexa Fluor™ 647 Phalloidin                              | Thermofisher          | A22287                     |
| Donkey anti-Goat Secondary Antibody<br>Alexa Fluor™ 647  | Invitrogen            | A-21447                    |
| Donkey anti-Goat Secondary Antibody<br>Alexa Fluor™ 546  | Invitrogen            | A-11056                    |
| Donkey anti-Mouse Secondary Antibody<br>Alexa Fluor™ 546 | Invitrogen            | A-10036                    |
| Goat anti-Mouse Secondary Antibody                       | Invitrogen            | A-11003                    |
| Alexa Fluor™ 546                                         |                       |                            |
| Goat anti-Rat Secondary Antibody                         | Invitrogen            | A-11006                    |
| Alexa Fluor™ 488                                         |                       |                            |
| Donkey anti-Rabbit Secondary Antibody                    | Invitrogen            | A-21207                    |
| Alexa Fluor™ 594                                         |                       |                            |
| <b>Chemicals, peptides, and recombinant proteins</b>     |                       |                            |
| KnockOut Serum Replacement                               | Gibco/Invitrogen      | Catalog # 10828-028        |
| 2-Mercaptoethanol (55mM)                                 | Gibco/Invitrogen      | Catalog # 11140-050        |
| Basic FGF (FGF2)                                         | PeproTech             | Catalog # 100-18B          |
| B27 supplement                                           | Life Tech             | Catalog # 17504-044        |
| Sodium Butyrate                                          | Sigma                 | Catalog # B5887            |
| Activin A                                                | R&D Systems           | Catalog # 338-AC           |
| Wnt3a                                                    | R&D Systems           | Catalog # 5036-WNP         |
| Dexamethasone                                            | Sigma                 | Catalog # D2915            |
| Insulin                                                  | Novo Nordisk          | Catalog # NDC 0169-1835-11 |
| 1-thioglycerol                                           | Sigma                 | Catalog # M6145            |
| HGF                                                      | R&D Systems           | Catalog # 294-HGN          |
| FGF4                                                     | R&D Systems           | Catalog # 235-F4           |
| BMP2                                                     | R&D Systems           | Catalog # 355-BM           |
| BMP4                                                     | R&D Systems           | Catalog # 314-BP           |
| DMSO                                                     | Sigma                 | Catalog # D2650            |
| OSM                                                      | R&D Systems           | Catalog # 295-OM-010/CF    |
| <b>Critical commercial assays</b>                        |                       |                            |
| Human Albumin ELISA Quantitation Set                     | Bethyl                | E80-129                    |



---

#### Experimental models: Cell lines

|                                                                 |                                 |                                                                                 |
|-----------------------------------------------------------------|---------------------------------|---------------------------------------------------------------------------------|
| Human Embryonic Stem cell line H9<br>RUNX1CGFP/w SOX17mCHERRY/w | MCRI Blood<br>development Group | <a href="https://doi.org/10.1038/nbt.3702">https://doi.org/10.1038/nbt.3702</a> |
| Irradiated Mouse Embryonic Fibroblasts                          | R&D Systems                     | PSC001                                                                          |
| Chimeric mice with humanized livers (PXB-<br>mice®)             | PhoenixBio Co.<br>Japan         | doi: 10.3390/ijms15010058                                                       |

---

#### Oligonucleotides

|                    |            |                     |
|--------------------|------------|---------------------|
| Primers for RT PCR | This paper | see <b>Table S2</b> |
|--------------------|------------|---------------------|

---

Table S2. List of the primers

| Gene         | Forward                  | Reverse                     |
|--------------|--------------------------|-----------------------------|
| GAPDH        | GGAGTCAACGGATTTGGT       | AAGATGGTGATGGGATTTCCA       |
| OCT4         | GGAGTCAACGGATTTGGT       | AAGATGGTGATGGGATTTCCA       |
| SOX17        | GGAGTCAACGGATTTGGT       | AAGATGGTGATGGGATTTCCA       |
| Albumin      | GCACAGAATCCTTGGTGAACAG   | ATGGAAGGTGAATGTTTTTCAGCA    |
| A1AT         | ACTGTCAACTTCGGGGACAC     | CATGCCTAAACGCTTCATCA        |
| HNF1 $\beta$ | GTACGTCAGAAAGCAACGAGAGAT | TGACTGCTTTTGTCTGTCATATTTCCA |
| BSEP         | AAATATGCTTTTGGGTCATTG    | GTCAGCTATGGCATCATTG         |
| MRP2         | TCCAACGTGCTTCAAGC        | GGCATCCACAGACATCAG          |
| MRP3         | CCTGCTGATACAGTATGAGCGGC  | TGTAGAAGGTGGTGAAGCGGAAG     |
| MDR1         | GTCATCGCTGGTTTCGATGATG   | ATTCCTGCTGTCTGCATTGTG       |
| CYP1A2       | GCTTCTACATCCCCAAGAAAT    | ACCACTTGGCCAGGACT           |
| CYP2C9       | CCAGATCTGCAATAATTTTCTC   | CAAGCTTTCAATAGTAAATTCAGATG  |
| CYP2D6       | CTTGGACAAAGCCGTGA        | GACAGCATTTCAGCACCTC         |
| CYP3A4       | ACTGCCTTTTTTGGGAAATA     | GGCTGTTGACCATCATAAAAG       |
| OATP1B1      | TCATACTCTGTGAAAACAAATCAG | CAGACTGGTTCCCATTGAC         |
| OATP1B3      | CTCTGTTTGCTAAAATGTACGTG  | GAAGAAATAATGGAAAATAGTCCAG   |

Table S3. List of the media and GFs

|                    | dHCGM     | S2 media  | S3 media  |
|--------------------|-----------|-----------|-----------|
| Basal media        | DMEM      | IMDM      | IMDM      |
| Glucose            | 1g/L      | 4.5g.L    | 4.5g.L    |
| NaHCO <sub>3</sub> | 3.7g/L    | 36mM      | 36mM      |
| HEPES              | w/0       | 25mM      | 25mM      |
| Sodium pyruvate    | 0.11g/L   | 1mM       | 1mM       |
| HEPES              | 20mM      |           |           |
| Penicillin/Strep   | 100IU/mL  | 1%        | 1%        |
| FBS                | 10%       | 20%       | 5%        |
| Insulin (Novolin)  | 0.25ug/mL | 0.126U/ml | 0.126U/ml |
| Dexamethasone      | 50nM      | 100 nM    | 100 nM    |
| EGF                | 5ng/mL    |           |           |
| L-Proline          | 15ug/mL   |           |           |
| L-ascorbic Acid 2P | 0.1mM     |           |           |
| DMSO               | 2%        | 0.50%     | 0.50%     |
| 1-thioglycerol     |           | 0.3mM     |           |
| HGF                |           | 20 ng/ml  | 20 ng/ml  |
| FGF4               |           | 20 ng/ml  | 20 ng/ml  |
| BMP2               |           | 10 ng/ml  |           |
| BMP4               |           | 10 ng/ml  |           |
| OSM                |           |           | 10 ng/ml  |
